# Supplementary material
Source: PubMed Central journal article supplement (PMC2745822)
Supplement: NIHMS123632-supplement-Supp_Table_1.pdf [file NIHMS123632-supplement-Supp_Table_1.pdf]

**Supplemental Table 1. Selectivity of VU0152099 and VU0152100 were evaluated in radioligand binding assays in the LeadProfilingScreen® by MDS Pharma ([www.mdsp.com](http://www.mdsp.com)). VU0152099 and VU0152100 were tested at 10µM for orthosteric radioligand displacement against a large panel of 68 discrete GPCRs, ion channels, transporters and enzymes to ensure a clean ancillary pharmacology profile.**

| Target                                   | Species | % Inhibition |           | Target                                              | Species | % Inhibition |           |
|------------------------------------------|---------|--------------|-----------|-----------------------------------------------------|---------|--------------|-----------|
|                                          |         | VU0152099    | VU0152100 |                                                     |         | VU0152099    | VU0152100 |
| Adenosine A1                             | human   | 28           | -1        | Histamine H <sub>3</sub>                            | human   | 10           | 9         |
| Adenosine A2                             | human   | 46           | 43        | Imidazoline I <sub>2</sub> , Central                | rat     | 7            | 8         |
| Adenosine A3                             | human   | 28           | 40        | Interleukin IL-1                                    | mouse   | -19          | -4        |
| Adrenergic α <sub>1A</sub>               | rat     | 10           | 9         | Leukotriene, Cysteinyl CysLT <sub>1</sub>           | human   | -4           | -6        |
| Adrenergic α <sub>1B</sub>               | rat     | -7           | -7        | Melatonin MT <sub>1</sub>                           | human   | 15           | 20        |
| Adrenergic α <sub>1D</sub>               | human   | 1            | 1         | Muscarinic M <sub>1</sub>                           | human   | -3           | 0         |
| Adrenergic α <sub>2A</sub>               | human   | 7            | 17        | Muscarinic M <sub>2</sub>                           | human   | -1           | -4        |
| Adrenergic β <sub>1</sub>                | human   | 17           | 17        | Muscarinic M <sub>3</sub>                           | human   | -1           | -2        |
| Adrenergic β <sub>2</sub>                | human   | 30           | 35        | Neuropeptide Y Y <sub>1</sub>                       | human   | 2            | 9         |
| Androgen (testosterone)AR                | rat     | 6            | 6         | Neuropeptide Y Y <sub>2</sub>                       | human   | -2           | 2         |
| Bradykinin B <sub>1</sub>                | human   | 13           | 1         | Nicotinic Acetylcholine                             | human   | 6            | -6        |
| Bradykinin B <sub>2</sub>                | human   | -5           | -9        | Nicotinic Acetylcholine α1, Bungarotoxin            | human   | -10          | -4        |
| Calcium channel L-type, benzothiazepine  | rat     | 13           | 7         | Opiate δ (OP1, DOP)                                 | human   | 2            | -13       |
| Calcium channel L-type, dihydropyridine  | rat     | 21           | 17        | Opiate κ (OP2, KOP)                                 | human   | 5            | 2         |
| Calcium channel N-type                   | rat     | -8           | -4        | Opiate μ (OP3, MOP)                                 | human   | 2            | -2        |
| Dopamine D <sub>1</sub>                  | human   | 6            | 7         | Phorbol Ester                                       | mouse   | 2            | 4         |
| Dopamine D <sub>2S</sub>                 | human   | 2            | 0         | Platelet Activating Factor (PAF)                    | human   | 13           | 22        |
| Dopamine D <sub>3</sub>                  | human   | -1           | 5         | Potassium Channel [K <sub>A</sub> TP]               | hamster | 3            | 6         |
| Dopamine D <sub>4.2</sub>                | human   | -13          | -11       | Potassium Channel hERG                              | human   | 5            | 5         |
| Endothelin ET <sub>A</sub>               | human   | -8           | -8        | Prostanoid EP <sub>4</sub>                          | human   | 15           | 7         |
| Endothelin ET <sub>B</sub>               | human   | 2            | -4        | Purinergic P <sub>2X</sub>                          | rabbit  | 6            | -4        |
| Epidermal Growth Factor (EGF)            | human   | 9            | -5        | Purinergic P <sub>2Y</sub>                          | rat     | 15           | 14        |
| Estrogen ERα                             | human   | -1           | -1        | Rolipram                                            | rat     | 36           | 29        |
| G protein-coupled receptor GPR103        | human   | -3           | -4        | Serotonin (5-Hydroxytryptamine) 5-HT <sub>1A</sub>  | human   | 2            | 2         |
| GABA <sub>A</sub> Flunitrazepam, central | rat     | 51           | 43        | Serotonin (5-Hydroxytryptamine) 5-HT <sub>3</sub>   | human   | -2           | 14        |
| GABA <sub>A</sub> Muscimol, central      | rat     | 6            | 9         | Sigma σ <sub>1</sub>                                | human   | 2            | 6         |
| GABA <sub>B1A</sub>                      | human   | -7           | 12        | Sigma σ <sub>2</sub>                                | rat     | -8           | -3        |
| Glucocorticoid                           | human   | -3           | 8         | Sodium Channel, Site 2                              | rat     | 11           | 20        |
| Glutamate, Kainate                       | rat     | 3            | -15       | Tachykinin NK <sub>1</sub>                          | human   | -15          | -18       |
| Glutamate, NMDA, Agonism                 | rat     | 17           | 22        | Thyroid Hormone                                     | rat     | -1           | 0         |
| Glutamate, NMDA, Glycine                 | rat     | 3            | 2         | Transporter, Dopamine (DAT)                         | human   | 27           | 46        |
| Glutamate, NMDA, Phencyclidine           | rat     | 2            | 3         | Transporter, GABA                                   | rat     | 26           | 13        |
| Histamine H <sub>1</sub>                 | human   | 14           | 7         | Transporter, Norepinephrine (NET)                   | human   | 34           | 22        |
| Histamine H <sub>2</sub>                 | human   | 7            | 10        | Transporter, Serotonin (5-Hydroxytryptamine) (SERT) | human   | 0            | 4         |
