# Supplementary material
Source: PubMed Central journal article supplement (PMC2745822)

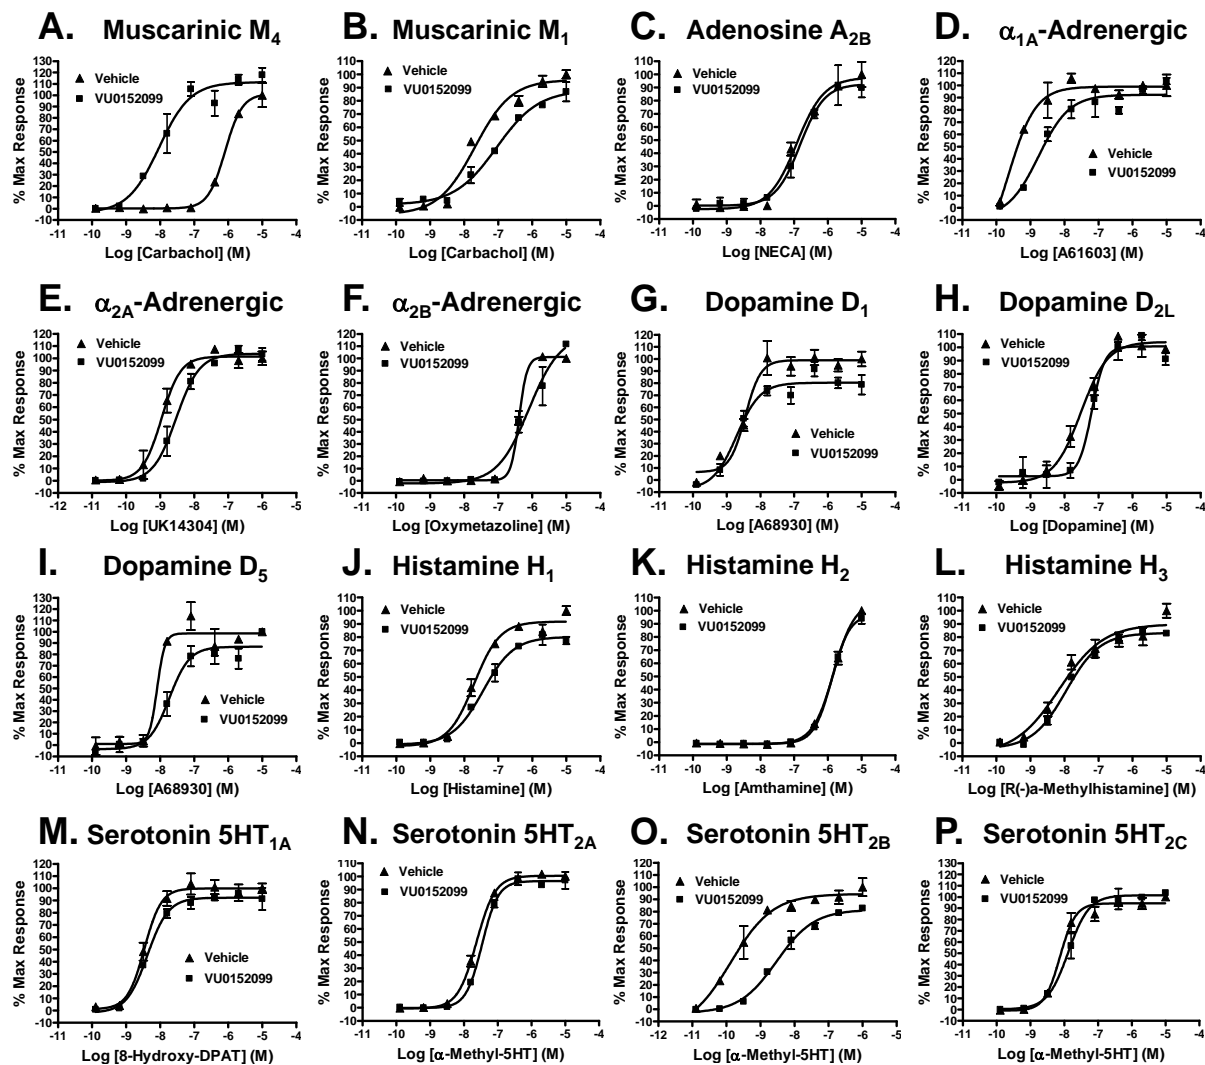

Supplement: NIHMS123632-supplement-Supp_Fig_1.pdf [file NIHMS123632-supplement-Supp_Fig_1.pdf]
